# Supplementary material for: Foot-related diabetes complications: care pathways, patient profiles and costs
Source: Springer Nature journal article supplement (doi:10.1186/s12913-022-07853-2), 2022-04-26

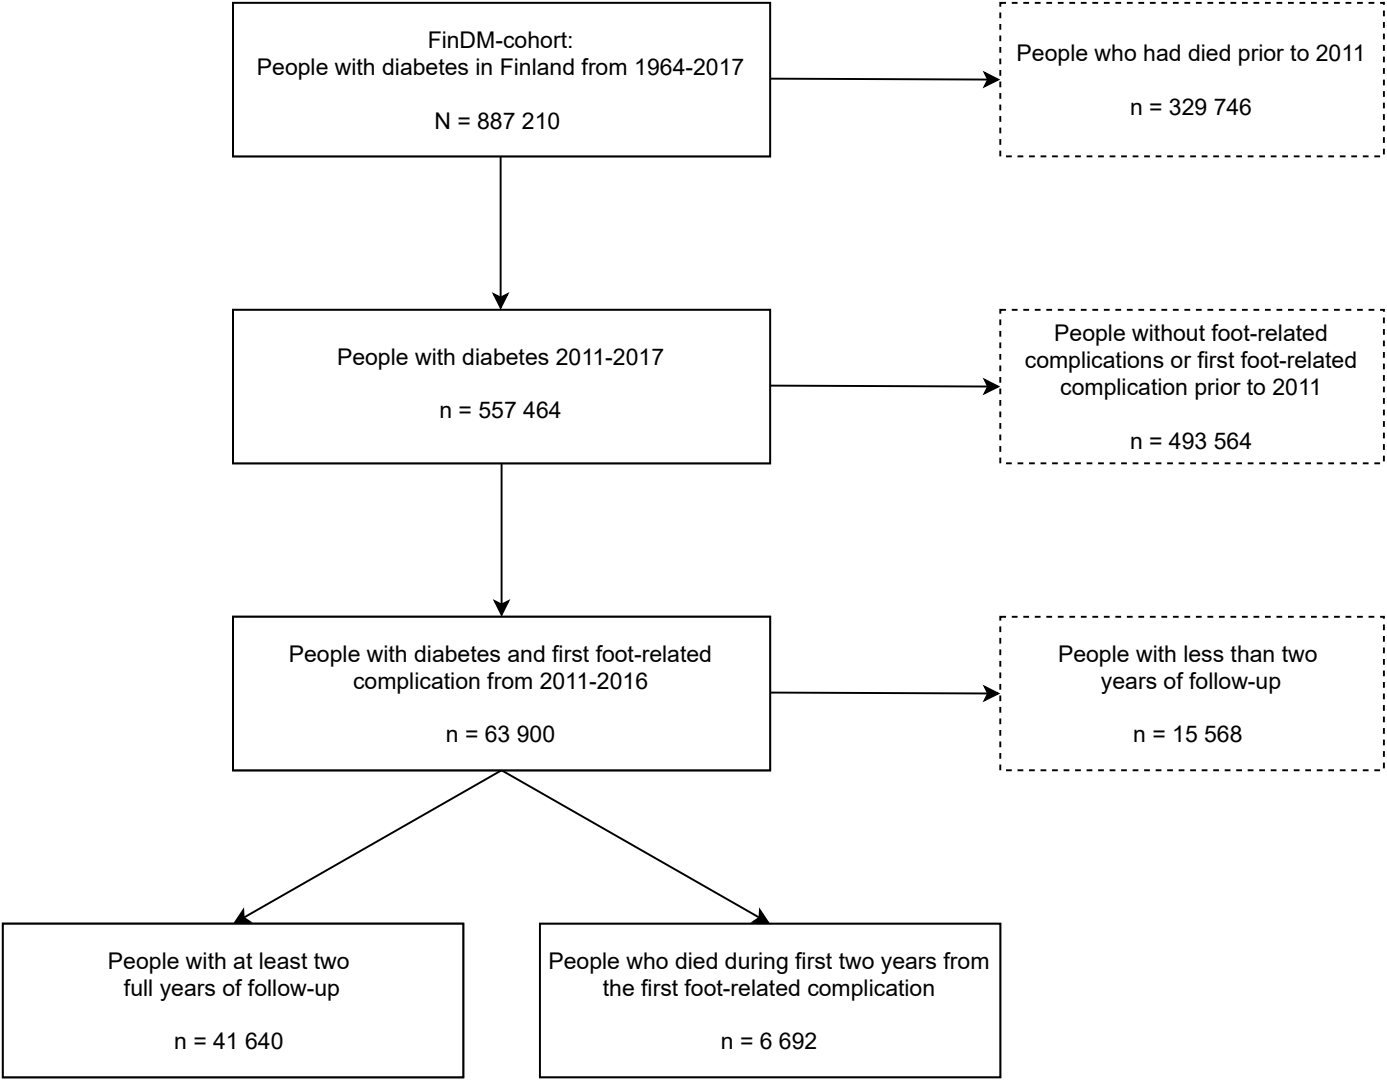

Supplement: MOESM1 [file 20345766]
